# Supplementary material for: Generation of locus coeruleus norepinephrine neurons from human pluripotent stem cells
Source: PubMed Central journal article supplement (PMC11392812; doi:10.1038/s41587-023-01977-4), 2023-11-16
Supplement: 41587_2023_1977_MOESM1_ESM.pdf [file 41587_2023_1977_MOESM1_ESM.pdf]

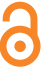

---

# Generation of locus coeruleus norepinephrine neurons from human pluripotent stem cells

---

In the format provided by the  
authors and unedited

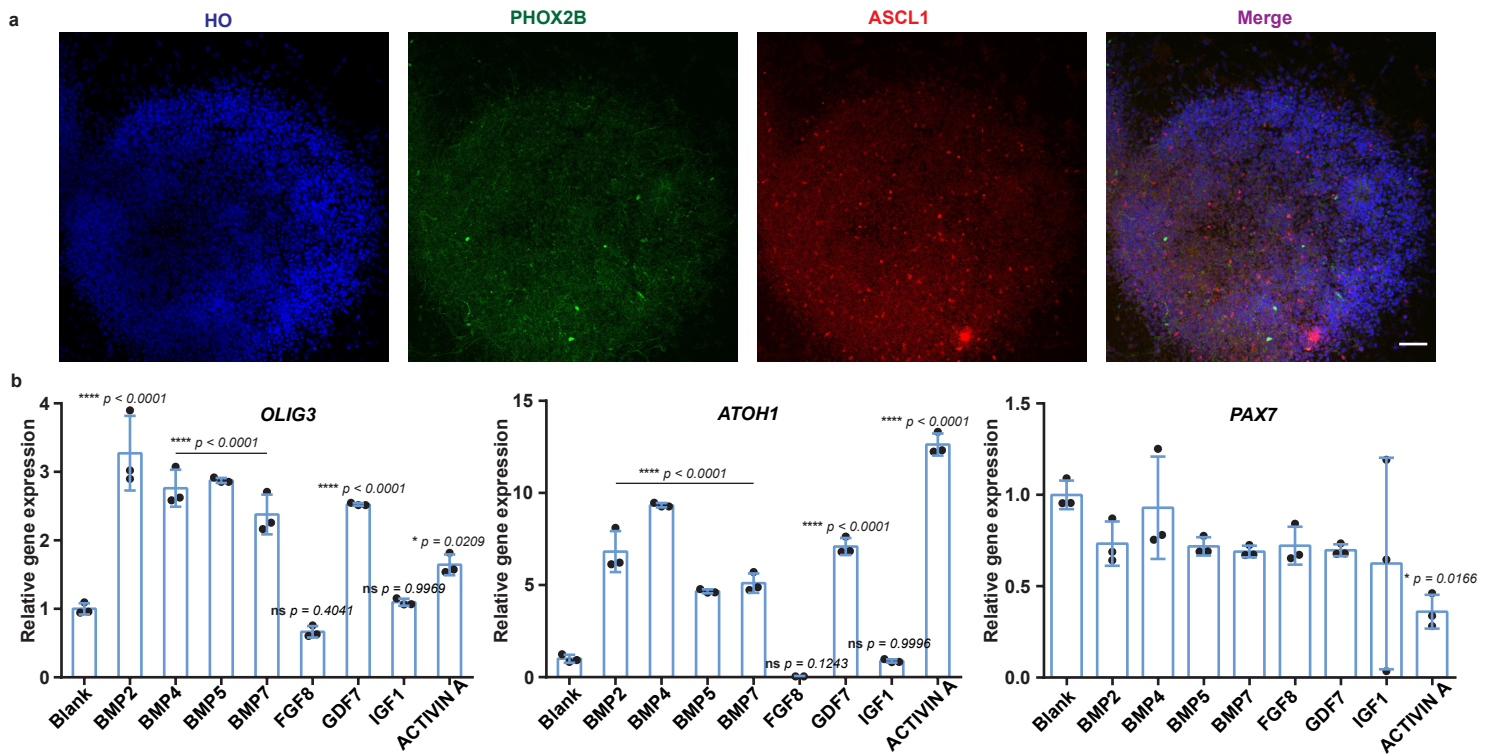

**Supplementary Figure 1 NE fate specification a,** Immunostaining for norepinephrine neural progenitor markers ASCL1 and PHOX2B at day 6 from cells treated with 1.0  $\mu$ M CHIR99021. HO, Hoechst. Scale bar, 50  $\mu$ m. **b,** qPCR of regional neural progenitor markers *OLIG3*, *ATOH1* and *PAX7* under the treatment of BMPs, FGF8, GDF7, IGF1 and ACTIVIN A. Data are shown as mean  $\pm$  SD. n = 3 biologically independent samples. The significance compared to “Blank” condition was assessed by one way ANOVA (Dunnnett’s comparisons test). \*  $p < 0.05$ , \*\*  $p < 0.01$ , \*\*\*  $p < 0.001$  and \*\*\*\*  $p < 0.0001$ . ns, not significant.

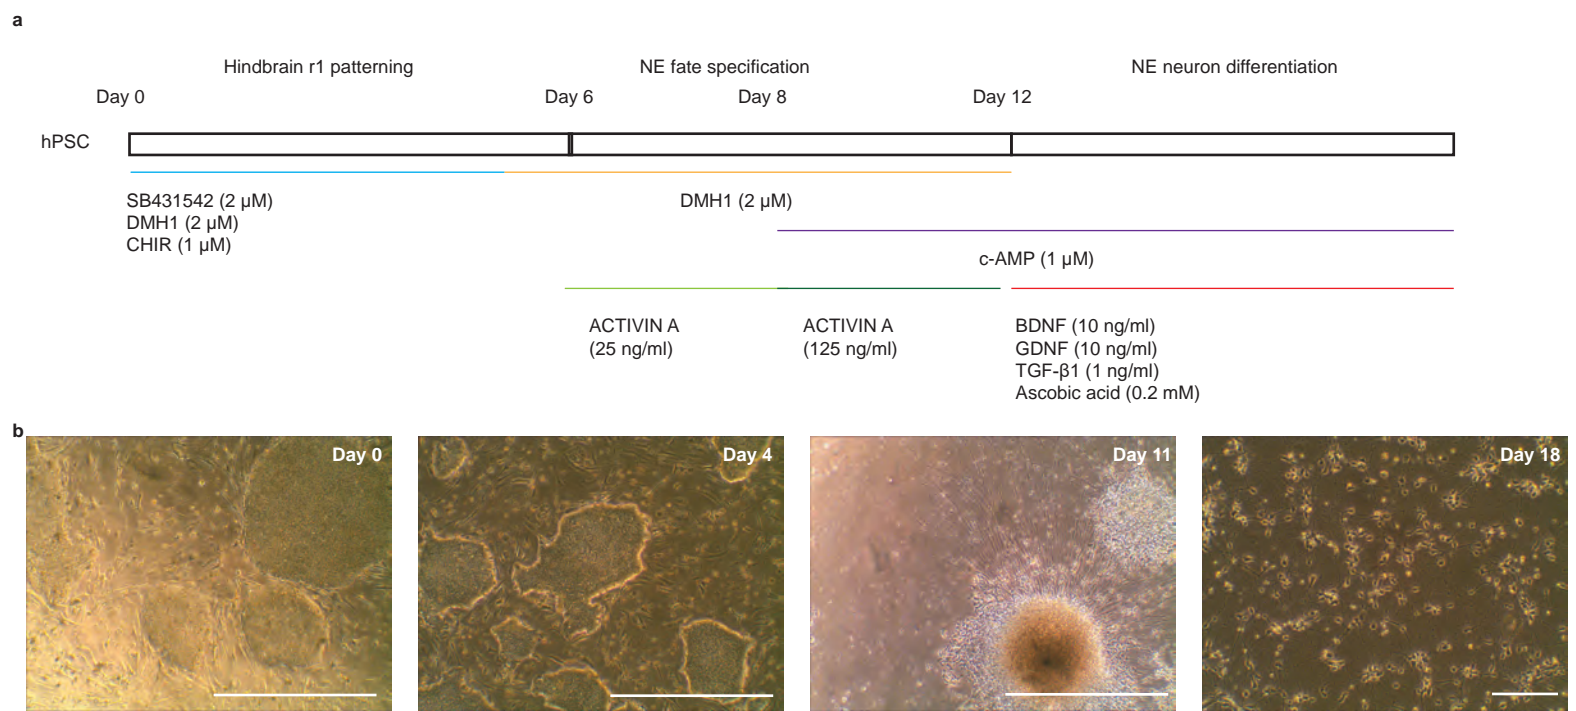

**Supplementary Figure 2 NE neuron differentiation a**, The diagram of the NE neural differentiation protocol. **b**, The bright field view of cells at different time points along NE neural differentiation. Scale bars, 1 mm.



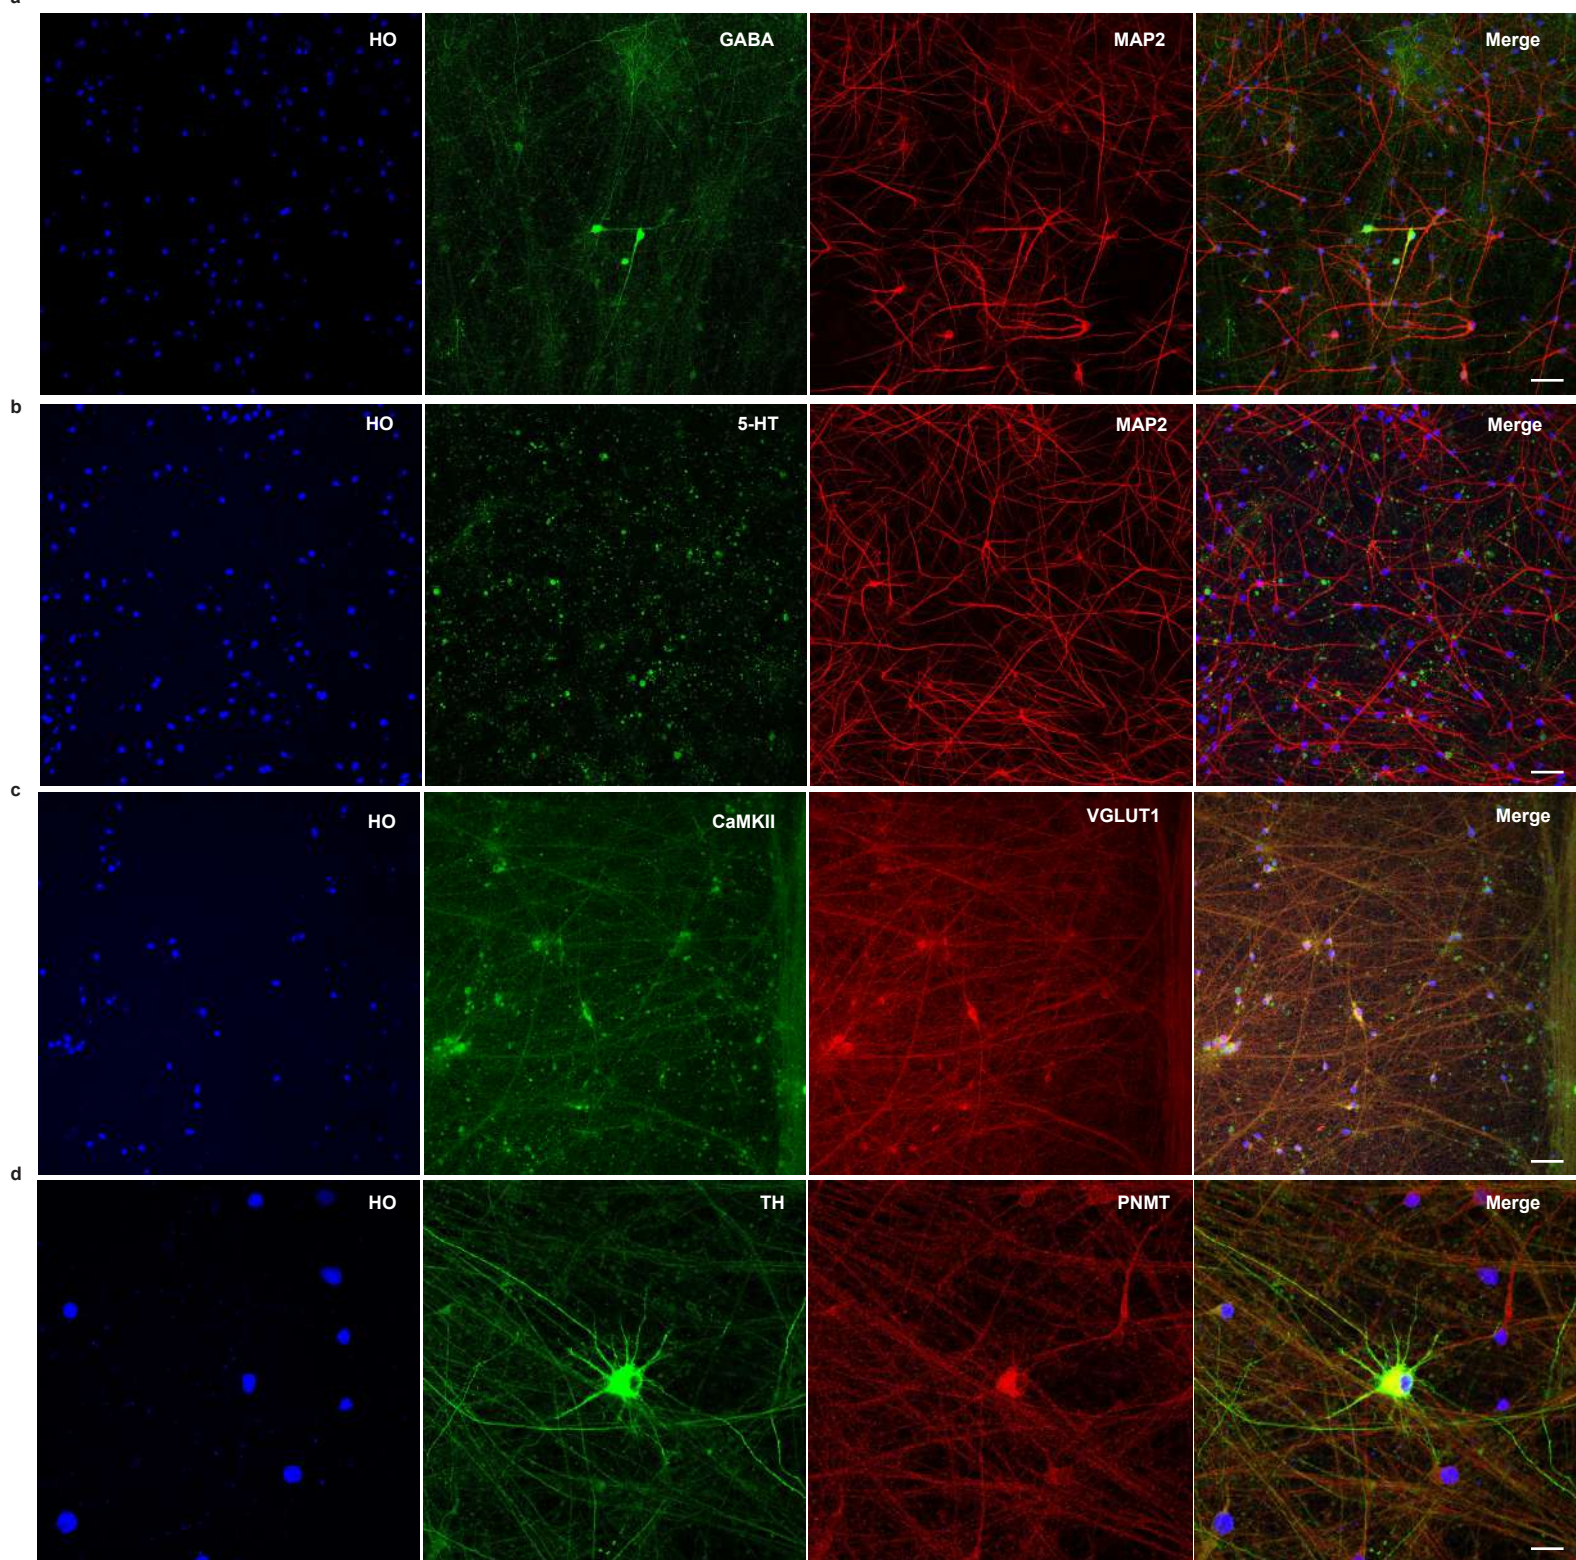

**Supplementary Figure 3 NE neuron differentiation (a-d)**, immunostaining for GABA, 5HT, VGLUT1, CaMKII and PNMT in NE neurons at day 30. HO, Hoechst. Scale bars in (a-c), 50  $\mu\text{m}$ ; Scale bar in (d), 20  $\mu\text{m}$ .



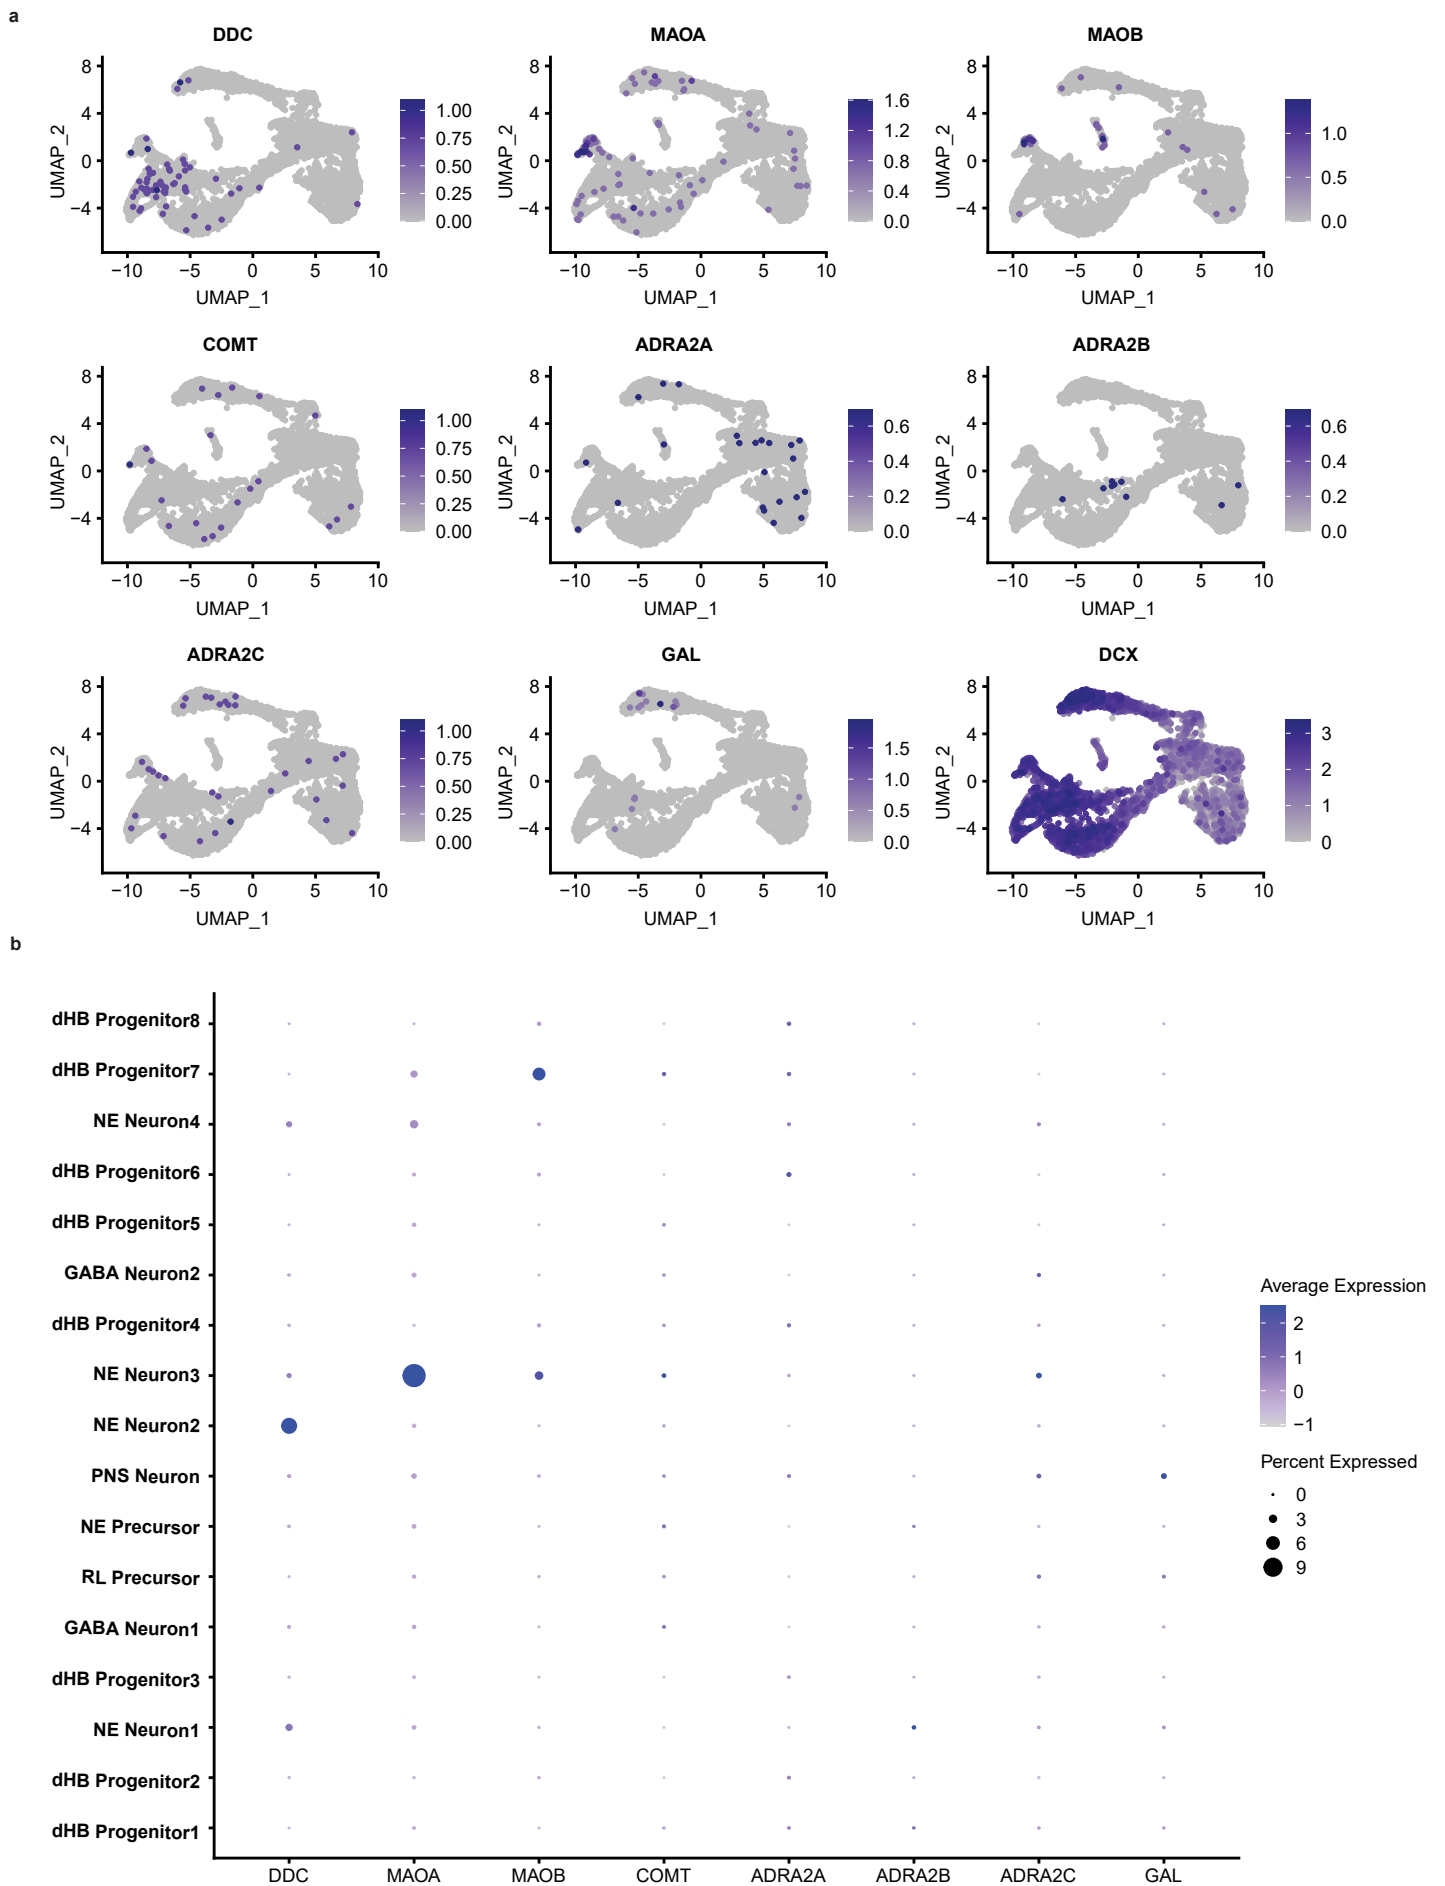

**Supplementary Figure 4 NE neuronal marker expression at day 14 a, Feature plots of later NE markers in day 14 sample. b, Dot plots of later NE markers in each cluster of day 14 snRNA-Seq dataset.**

a

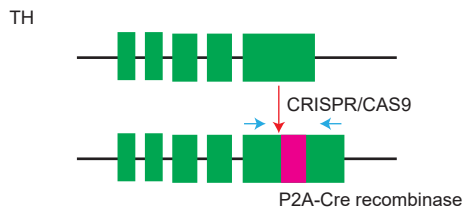

b

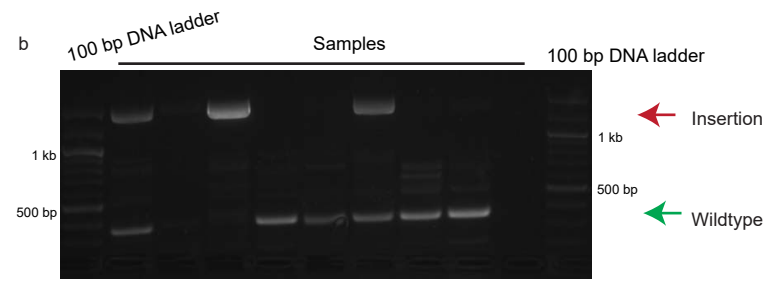

**Supplementary Figure 5 Generation of TH reporter cell line a**, Schematic diagram of experimental design for generating the TH reporter cell line. The blue arrows indicate the primer designed for genotyping. **b**, The genotyping PCR of the candidate cell lines. The red arrow and green arrow indicate the insertion and wildtype bands respectively.

a

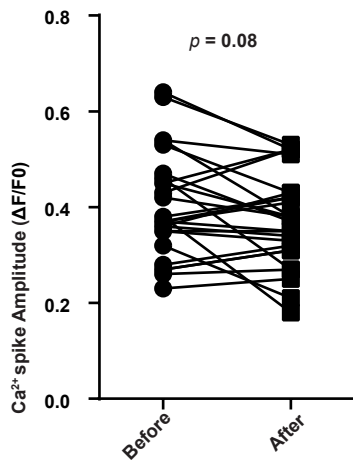

b

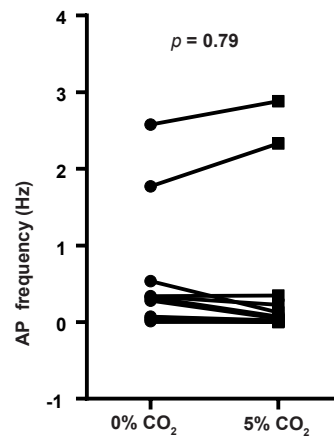

**Supplementary Figure 6 Functional properties of NE neurons a**, Quantification of calcium spike amplitude in NE neurons before, at, and after cocktail blockers. Data are shown as symbols and lines in the “before-after” pattern.  $n = 26$  neurons. Significance was assessed by paired t-test (two tailed).

**b**, Quantification of firing rate change in non-TH cells from the NE differentiating culture. Data are shown as symbols and lines in the “before-after” pattern.  $n = 14$  neurons. Significance was assessed by paired t-test (two tailed).



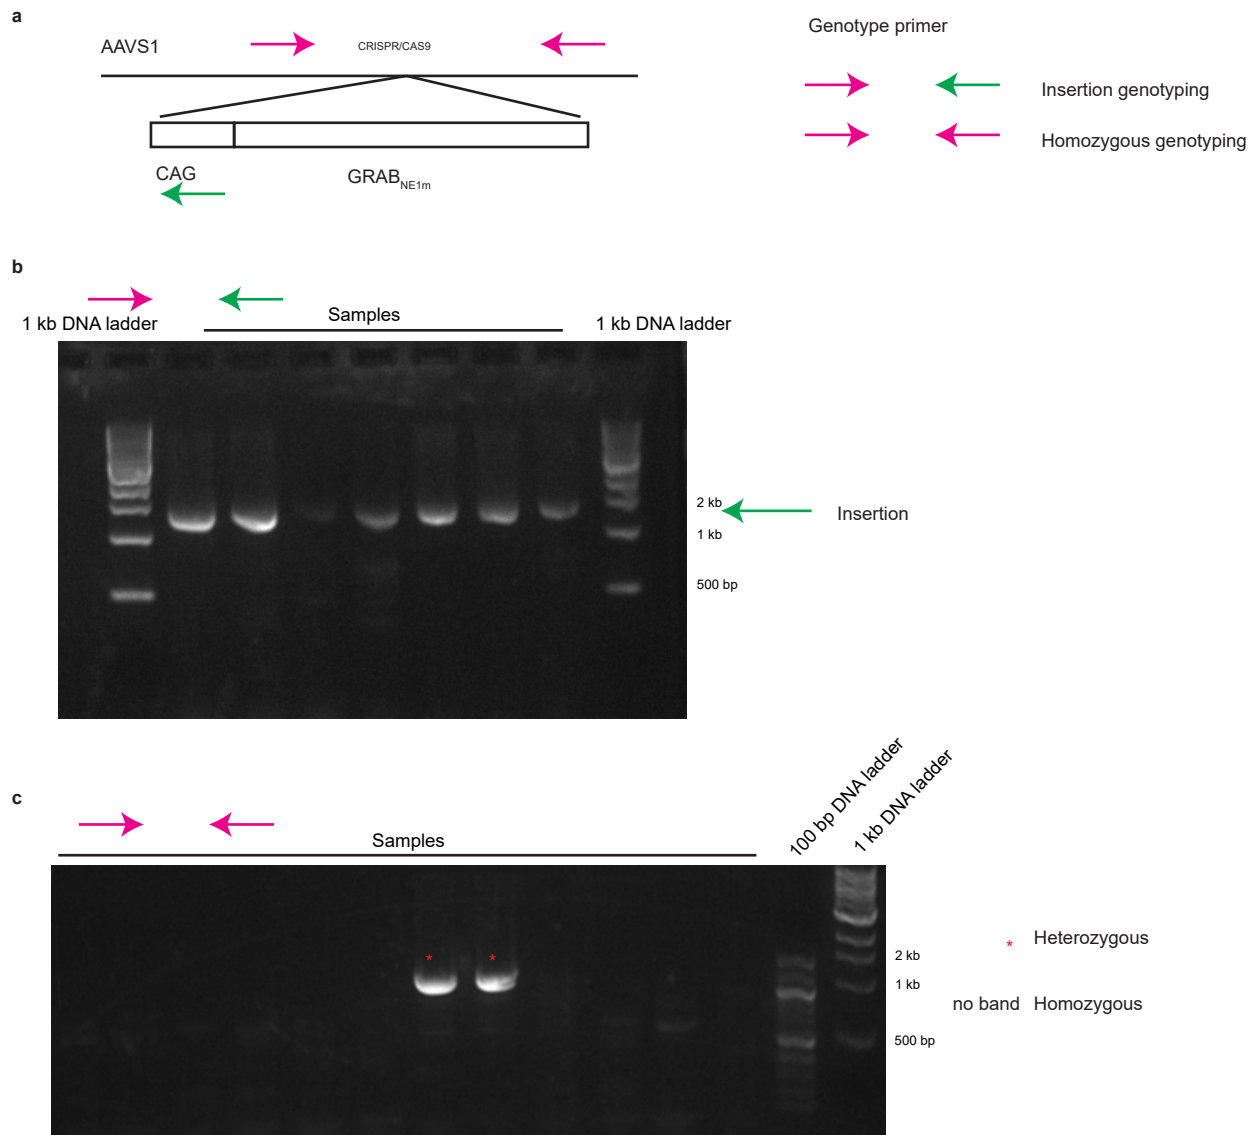

**Supplementary Figure 7 Generation of NE sensor cell line a**, Schematic diagram of experimental design for generating cell line expressing norepinephrine sensor GRAB<sub>NE1m</sub>. The genotyping primers were shown by the arrows. **b,c**, The genotyping PCR of the candidate cell lines using primers to detect insertion (**b**) and homozygosity (**c**).
